# Supplementary material for: Bimetallic palladium nickel nanoparticles loaded on ammonia-alkalized multi-walled carbon nanotubes for efficient dehydrogenation of formic acid
Source: Royal Society of Chemistry journal article supplement (doi:10.1039/d4nj00481g), 2024-01-01
Supplement: d4nj00481g1.pdf [file d4nj00481g1.pdf]

## Supplementary Information

# Bimetallic palladium nickel nanoparticles loaded on ammonia-alkalized multi-walled carbon nanotubes for efficient dehydrogenation of formic acid

### 1. Chemicals:

Multi-walled carbon nanotubes (Shandong Dazhan nano materials Co., Ltd, 97%), O-phenylenediamine (OPDA, Shanghai Macklin Biochemical Co., Ltd, >98%), acetone (Yantai Yuandong Fine Chemical Co., Ltd, >99.5%), potassium chloropalladite ( $K_2PdCl_4$ , Shanghai Macklin Biochemical Co., Ltd, >98%), nickel nitrate hexahydrate ( $Ni(NO_3)_2 \cdot 6H_2O$ , Tianjin Bodhi Chemical Co., Ltd, >98%), sodium borohydride ( $NaBH_4$ , Shanghai Shanpu Chemical Co., Ltd,  $\geq 96.0\%$ ), formic acid (FA, Shanghai Macklin Biochemical Co., Ltd, >98%), and deionized water.

### 2. Characterization

X-ray diffraction (XRD) was performed using a Rigaku D/MAX/2500 PC powder X-ray diffractometer containing Cu-K (40kv, 40mA) radiation. Infrared (IR) spectrograms were obtained with a Thermo Fisher Nicolet IS10 infrared spectrometer. Transmission electron microscopy (TEM) maps and high-resolution transmission electron microscopy (HR-TEM) maps were measured on a Tecnai G2 F30 S-Twin instrument in conjunction with a 200Kv field emission gun. The scanning electron microscope (SEM) model JSM-6700F was used to obtain the topography and energy dispersive spectra (EDS). X-ray photoelectron spectroscopy (XPS) was acquired with an ESCALAB 250Xi spectrophotometer. GC-8A (Molecular Sieve 5A, carrier gas Ar as carrier gas) and GC-8A (Porapack N, He as carrier gas) analyzers (Shimadzu) were used to analyze the gases collected after at least three times of the reactor with argon.

### 3. Calculation methods

The turnover frequency (TOF) reported here is an apparent TOF value based on the number of metal atoms in catalyst, which is calculated from the equation as follow:

$$TOF = P_0V / (2RTn_Mt)$$

Where  $P_0$  is the atmospheric pressure (101325 Pa),  $V$  is the final generated volume of ( $H_2+CO_2$ ) gas,  $R$  is the universal gas constant ( $8.3145 \text{ m}^3 \text{ Pa mol}^{-1} \text{ K}^{-1}$ ),  $T$  is the room temperature (298 K),  $n_M$  is the total mole number of Pd and Ni atoms in the catalyst and  $t$  is the completion time of the reaction in hour.

#### **4. Durability testing of the catalysts**

After the first decomposition of formic acid by catalyst  $Pd_{0.7}Ni_{0.3}/OPDA-MWCNTs$  at 323 K, an equal amount of 6 mmol of formic acid was added to the flask. The cycle test performance of the catalyst was obtained by repeating the operation five times.

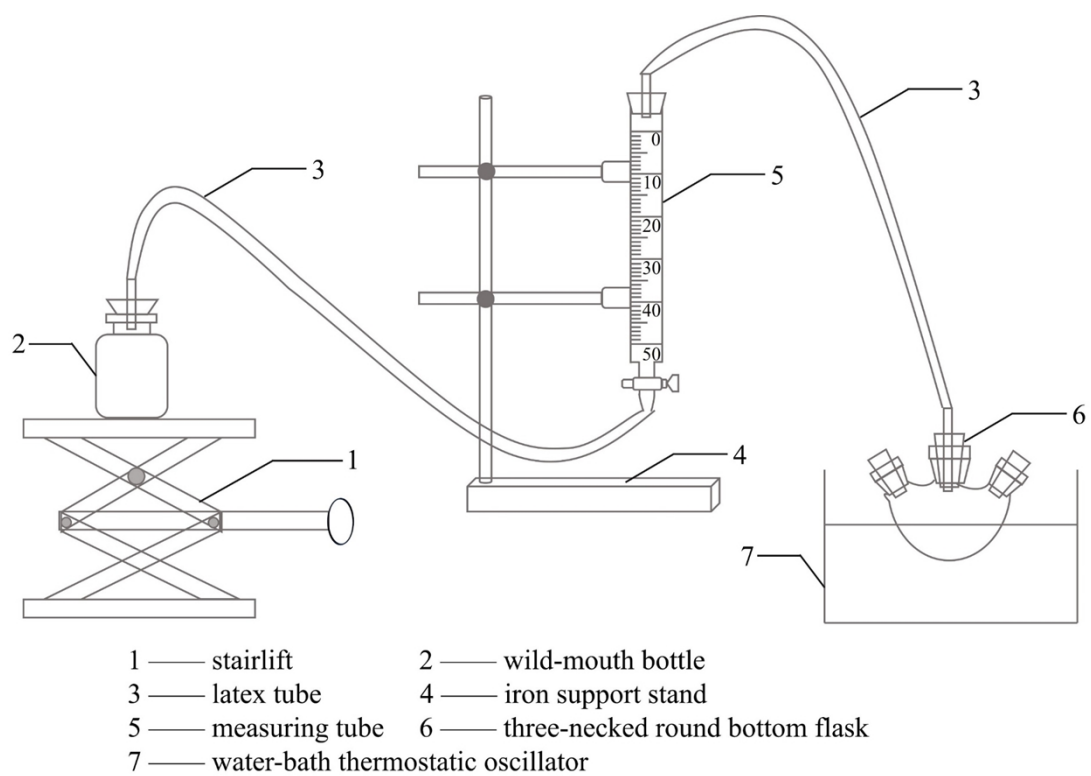

**Fig. S1.** The schematic diagram of the experimental set-up for catalytic performance testing.

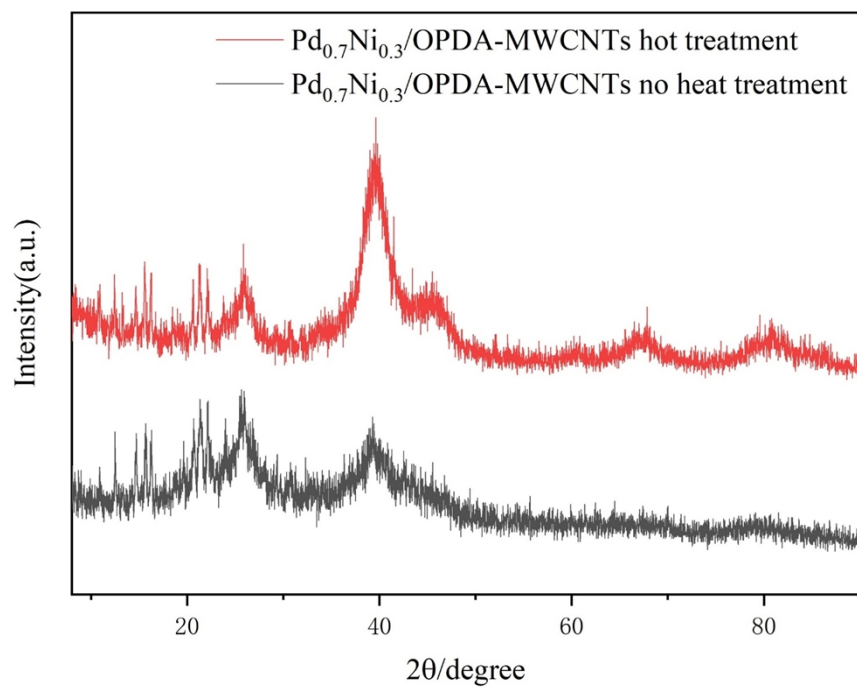

**Fig. S2.** The XRD comparison of the catalyst Pd<sub>0.7</sub>Ni<sub>0.3</sub>/OPDA-MWCNTs with and without heat treatment.

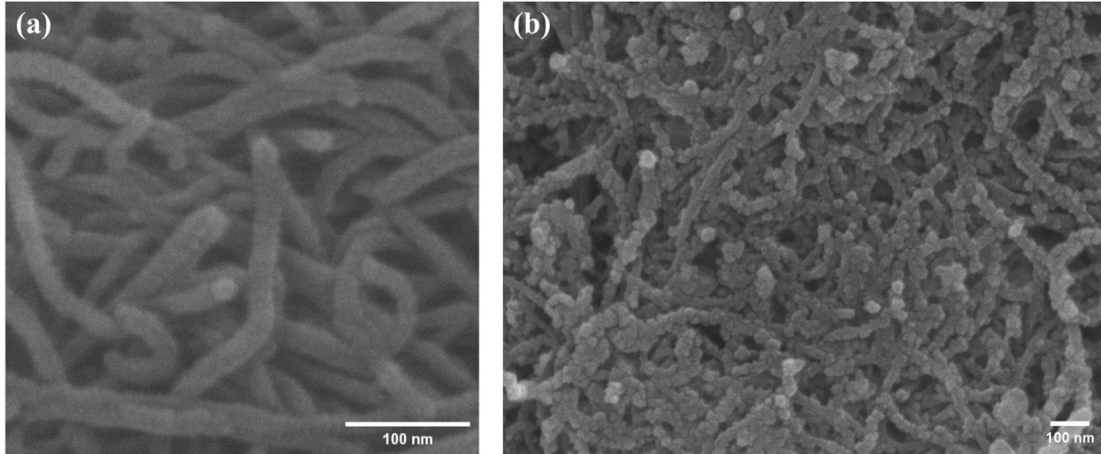

**Fig. S3.** SEM images of (a) MWCNTs and (b) Pd<sub>0.7</sub>Ni<sub>0.3</sub>/OPDA-MWCNTs.

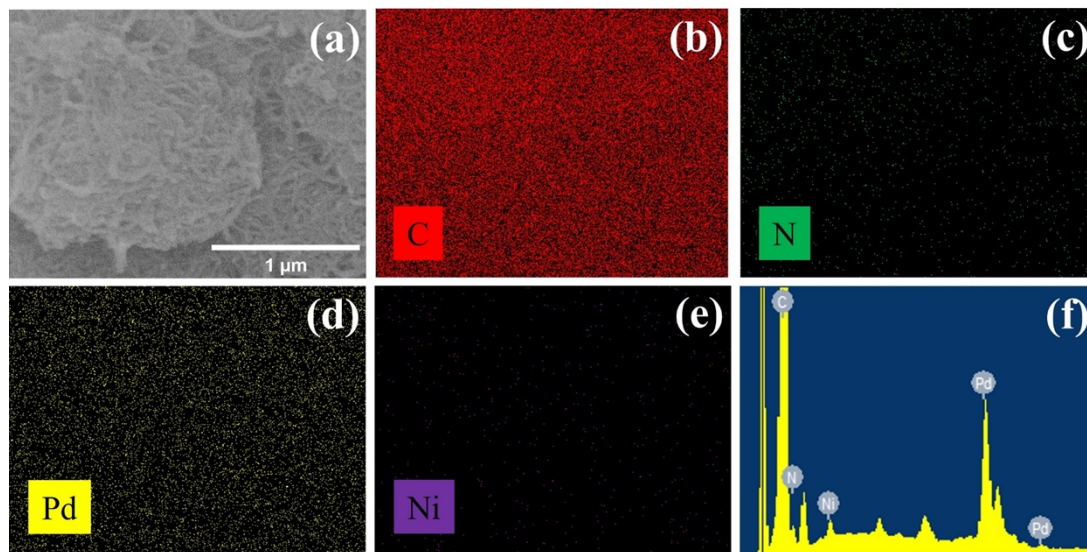

**Fig. S4.** Elemental mappings of C, N, Pd and Ni.

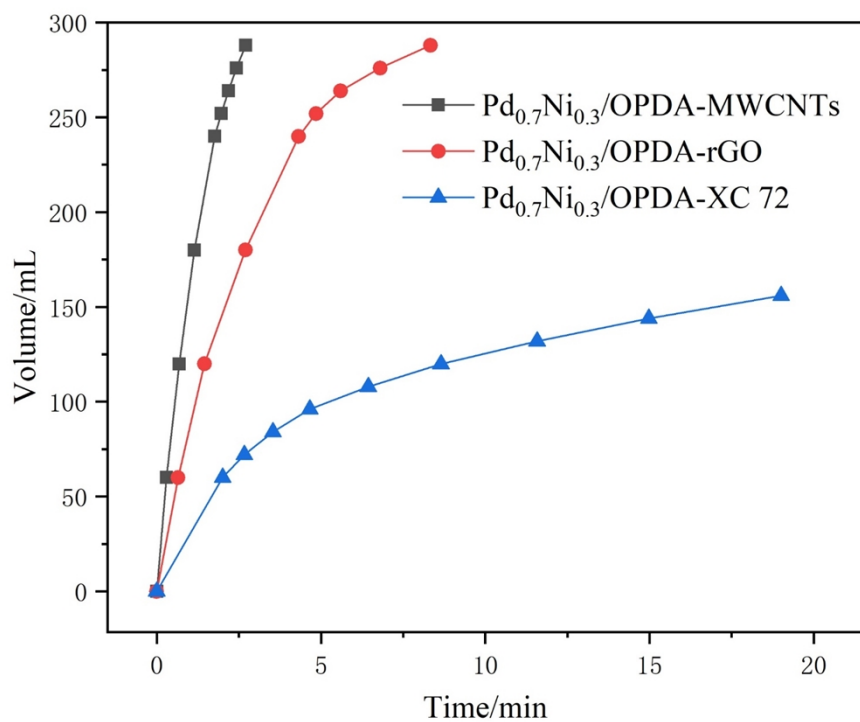

**Fig. S5** Volume of the generated gas versus time for the dehydrogenation of FA over Pd<sub>0.7</sub>Ni<sub>0.3</sub>/OPDA-MWCNTs, Pd<sub>0.7</sub>Ni<sub>0.3</sub>/OPDA-rGO, Pd<sub>0.7</sub>Ni<sub>0.3</sub>/OPDA-XC 72.

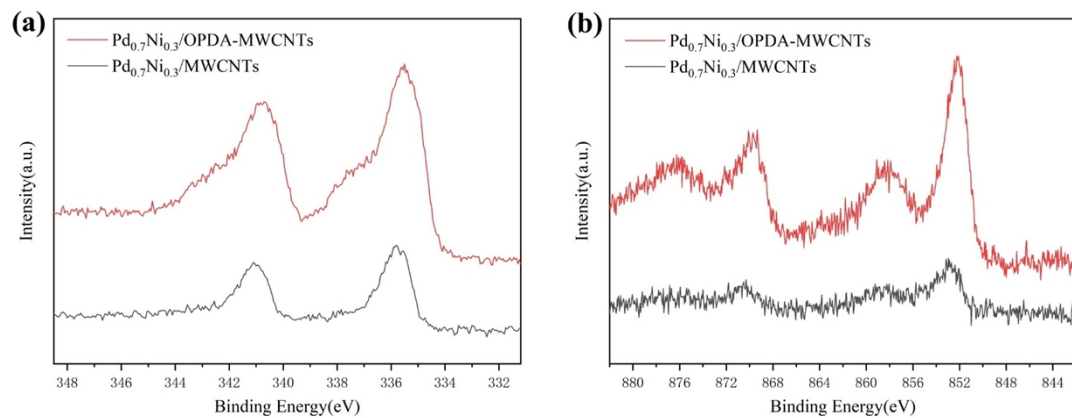

**Fig. S6.** (a, b) XPS spectra of Pd and Ni for Pd<sub>0.7</sub>Ni<sub>0.3</sub>/OPDA-MWCNTs and Pd<sub>0.7</sub>Ni<sub>0.3</sub>/MWCNTs.



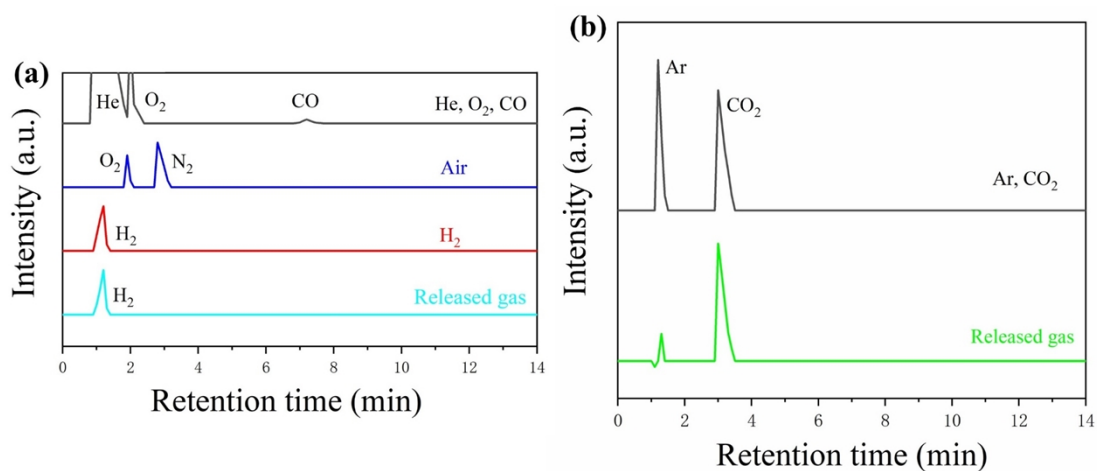

**Fig.S7.** (a) Gas chromatograms of CO, air and H<sub>2</sub> as reference gases and the released gas from FA decomposition over the as-prepared PdNi/OPDA-MWCNTs catalyst; (b) Gas chromatograms of CO<sub>2</sub> as reference gas and the released gas from FA decomposition over the as-prepared PdNi/OPDA-MWCNTs catalyst.

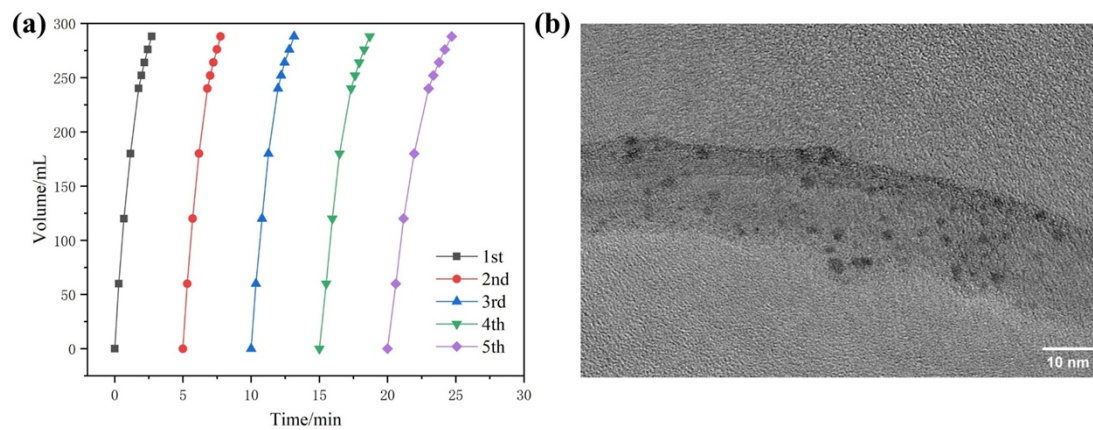

**Fig. S8.** Durability testing (a) of Pd<sub>0.7</sub>Ni<sub>0.3</sub>/OPDA-MWCNTs and TEM image (b) after cycling test.
